# Supplementary material
Source: HighWire-hosted journal article supplement (https://www.qdcxjkg.com/highwire/filestream/113561/field_highwire_adjunct_files/7/26_Clara1937.pdf)
Supplement: 26_Clara1937.pdf [file 26_Clara1937.pdf]

Reference no. 26 of

Winkelmann A, Noack T: The Clara cell – a 'Third Reich eponym'? *Eur Respir J* 2010; 36: 722–727

Clara M: Report on Professor Dr. Gesemann, Prague, dated 2 June 1937. 1937. *Archive*: Bundesarchiv Berlin. *Signature*: BArch, NS 15/237: pp. 120-135.

**Short comment by the authors:**

This is one of Clara's "expert assessments" (*Gutachten*, p. 1) of candidates for academic appointments, written in his function as the local "*Dozentenbundesführer*" (Leader of the local National Socialist League of Lecturers, p. 16). As stated in our article, this 16-page assessment prevented the appointment of Gerhard Gesemann from Prague to a newly founded chair for Slavonic studies in Leipzig. On p. 5 Clara accuses Gesemann of embracing Freudian psychoanalysis (a science seen as typically Jewish by National Socialists) and of collaborating with a Jewish professor (*Arm in Arm mit dem Juden Utitz*, i.e. "arm in arm with the Jew Utitz") and of thus going "against the concept of the Nordic Race" (*gegen den nordischen Rassegedanken*). On p.6, second paragraph, Clara repeats these points as the main basis for his "concerns" (*Bedenken*) regarding the appointment of Gesemann. He concludes his report by calling Gesemann "not politically reliable " (*politisch unzuverlässig*) on p. 16.

Gutachten

Über Professor Dr. Gesemann - Prag.

---

Wissenschaftlich:

Die Zignung Professor Gesemanns, die an unserer Universität neu begründete Professur für "Geschichte und Kultur Südosteuropas" zu bekleiden, ist hier in Leipzig wiederholt eingehend geprüft worden. Die Kommission, die zur Beratung des Dekans in dieser Angelegenheit eingesetzt worden ist, kommt zu keiner einheitlichen Stellungnahme. Das erklärt sich daraus, dass die eine Gruppe die Professur um jeden Preis besetzt haben will, die andere aber - und ihre Hauptvertreter sind gerade der slavist und derjenige Historiker, der, wie Gesemann es selbst tun will, Kultur und Geschichte vom Volkstum ausgehend betrachtet - Gesemann als wissenschaftlich ungeeignet bezeichnet.

Bei dieser Lage der Dinge vertritt sich die Auffassung: es ist besser, die Professur frei zu lassen, als sie mit einem ungeeigneten Manne zu besetzen.

Gesemann hat zwar auf den beiden für die Professur wesentlichen Sachgebieten, Slavistik und Kulturgeschichte des Balkans, gearbeitet, seine Leistungen in beiden Fächern erweisen ihn aber nicht als den richtung gebenden Wissenschaftler, den wir als persönlichen Mittelpunkt für unsere im Südosteuropa-Institut zusammengeschlossene Arbeitsgemeinschaft brauchen.

Ich kenne die beiden gewöhnlich einander polar entgegengesetzten Beurteilungsweisen der Wissenschaftlichkeit Professor Gesemanns. Die eine bezeichnet ihn als einen "Slavisten grössten Stils" und als "Gelehrten von Weltformat", die andere als "einen zufällig in die Wissenschaft geratenen Journalisten", Reiseschilderer und geistreichen Essayisten". Mit beiden Beurteilungsarten ist nichts anzufangen, denn die Superlative beider Gruppen von Beurteilern stehen in ursächlichem Zusammenhang: weil die einen Beurteiler Gesemann eine übertriebene Anerkennung zollen, nennen die anderen ihn "einen zufällig in die Wissenschaft geratenen Journalisten", und umgekehrt. Ich schliesse mich keinem dieser extremen Urteile an, sondern folge Bewertungen, die sich in ruhiger Überlegung ein richtiges Bild von Gesemanns Wissen-

schaftlichkeit zu machen suchen.

Slawistik.

Gesemann gab zuerst die in Erlangen von Berneker entdeckte Erlanger Liederhandschrift des 18. Jahrhunderts heraus (1925). Er brachte einen Abdruck der Handschrift, richtete den Text jedoch, was man von einer wissenschaftlichen Ausgabe fordert, nicht her, gab auch keine umfassende Behandlung des Liedstoffes, lieferte also nur etwas Provisorisches.

Ganz auf Freud'scher Psychoanalyse aufgebaut sind seine russischen Arbeiten. Er hat sie auch nicht mehr fortgesetzt, seitdem diese jüdische Richtung in Verruf geraten ist. Die Gogol-Studie, in der er auf dem Wege der Psychoanalyse charakterologisch einige Beobachtungen herauszuarbeiten sich bemüht, geht an der genialen Leistung Gogols vorbei. Gesemanns Arbeit ist wider seinen Willen der Beweis geworden, dass die Eigengesetzlichkeit des genialen Menschen auf diesem Wege nicht zu fassen ist.

1926 brachte er unter dem Titel "Studien zur südslawischen Volksepik" eine Sammlung verschiedener, bereits veröffentlichter Aufsätze heraus. Ein Aufsatz ist von wissenschaftlich grundsätzlicher Bedeutung. In ihm hat er ein wichtiges Sonderproblem des Heldenliedes, nämlich das Kompositionsschema, fördernd bearbeitet. Es muss allerdings angemerkt werden, dass schon Mathias Murko den Nachweis erbracht hat, dass der serbokroatische Sänger ein Improvisator ist und dass dieser Aufsatz überhaupt stark auf den Ideen dieses maßgebenden Vertreters der südslawischen Eposforschung steht.

Schliesslich ist in diesem Zusammenhang noch Gesemanns Beitrag zu Walzels Handbuch der Literaturwissenschaft über die serbokroatische Literatur zu erwähnen. Es ist eine orientierende Übersicht, die aus den Arbeiten anderer (Skerlic, Cvijić) zusammengestellt ist. Der Berliner Slavist, Professor Vasmer, erhebt wegen dieser serbokroatischen Literaturgeschichte einen sehr schweren Vorwurf gegen Gesemann. V. sagt in seinem Gutachten vom 1.2.ds.J.: "Ich mache ihm den Vorwurf, dass er ganz einseitig nur für Belgrad günstige Tatsachen hervorhebt und auf keine Weise zeigt, dass die Kroaten Träger einer viel älteren Kultur sind als die

Serben. Die mazedonische Frage betrachtet er auch stets durch die Belgrader Brille. Wer so vorgeht, führt nach meiner festen Überzeugung die deutsche Öffentlichkeit irre."

Sicherlich kann Gesemann sehr gut Serbisch. Dass er ausser Serbisch noch andere slavische Sprachen beherrscht, bezweifeln die Slavisten. Er hat sich nicht einmal in den 15 bis 16 Jahren, die er jetzt in Prag wirkt, um das Tscheckische bemüht.

Die slavistische Grundlage, von der Gesemann zur Volkskultur- und Kulturgeschichtsforschung kommt, ist also sehr schmal, da sie allein von der jugoslawischen (eigentlich nur serbischen) Volksepik gebildet wird. Dass die Sprachforschung einen besseren Ausgangspunkt gewährt hätte, sei erwähnt, ohne dass der leicht zu erbringende Beweis hier geführt würde.

#### Volkstums- und Kulturgeschichte.

Entscheidend vom Juden Utitz angeregt, liess Gesemann in 5. Band vom "Jahrbuch der Charakterologie", herausgegeben von Utitz, seine "Volkscharaktertypologie der Serbokroaten" (1928) erscheinen. Wie stets in seinen Arbeiten über das südslawische Volkstum fusst Gesemann wissenschaftlich auf dem grundlegenden Werk über die Balkanhalbinsel von Jovan Cvijić. Der 60 Seiten lange Artikel ist sehr geschickt und sehr klar geschrieben. Bei aller Abhängigkeit von Cvijić hat G. das Problem immerhin gefördert.

Ähnlichen Stoff behandelt er in seiner, soviel ich weiss, umfangreichsten Arbeit, die den Titel führt "Der montenegrinische Mensch" (1934, 222 Seiten). Die "gentile patriarchalische Kultur", wie G. sie in seiner fremdwortreichen Sprache nennt, ist hier das zentralthema. Es ist das Bild der patriarchalischen Hirtenkultur der serbisch-montenegrinischen Berglandschaft, so wie es in der Hauptsache dem hervorragenden südslawischen Volksforscher Cvijić entstammt.

Derselbe Stoff und die gleiche Quelle begegnen ~~sich~~ in Gesemanns Artikel "Volk, Landschaft und Kultur" in dem Sammelwerk "Das Königreich Südslawien" (1935), wo alles, was nicht serbisch ist, ungebührlich in den Hintergrund gerückt ist. Dasselbe scheint zu gelten von G's Beitrag "Kultur der Südslawen" in Kindermanns

Handbuch der Kulturgeschichte (im Erscheinen). In beiden Arbeiten ist ausserdem das bedeutende ethnographisch-kulturge-schichtliche Einteilungsschema von Cvijić in grosser und ge-schickter Aufmachung breit hingestellt, wobei das serbische Volk stark in den Vordergrund tritt, während die anderen Völker (Kroaten, Slowenen) zum Teil sehr schlecht wegkommen.

Mehrere Eigenschaften geben diesen kulturgeschichtlichen Arbeiten ein deutlich liberalistisches Gepräge.

Da ist zuerst die Ausdrucksformung. In einer fremdwort-reichen, geistreich sein sollenden Sprache jüdisch-journali-stischer Art liest man in dem Buch "Der montenegrinische Mensch" vom "nonchalanten" Auftreten des Montenegriners, seiner "Xeno-phobie", seinem "Genie des Agon", von der "misogynen Fassade", vom "Schleier erotischer Eeherrschaft", von "dinarischer Gewalt" u.ä. Diese Darstellungsweise passt nicht zur natürlichen Ein-fachheit des montenegrinischen Volkstums, verschiebt, ja verfälscht sogar das Volksbild.

Dann: sein Volksbegriff deckt sich nicht mit dem unsrigen. Noch 1930 sagt er in seiner serbokroatischen Literatur (S.5 Walzel's Handbuch) "Volksliteratur ist künstlerische Selbstge-staltung einer Kollektivseele" (von mir unterstrichen). Er spricht hier noch von "kollektiven Seelenbindungen" - d.h. von einer Seelenhaltung einer auf einem Raum vorhandenen Menge, die ja durch beliebige Massierung zusammengekommen sein kann - obwohl damals, 1930, das Ringen um den Volksbegriff gerade nach einem Jahrzehnt sehr lebhafter Erörterung gegen die Kollektivvorstellung und zu-gunsten der Auffassung des organisch Gewachsenen so gut wie ent-schieden war. Gesemanns Stellungnahme für die "kollektiven Seelenbindungen" hat aber wohl nicht das Unbekanntsein mit der Klärung des Volksbegriffes zur Voraussetzung, sondern ist offen-bar im Zusammenhang mit seiner A b l e h n u n g d e r R a s s e n l e h r e zu sehen. Er lehnt die Rassenlehre mehr-fach und strikt ab. Ganz eindeutig sagt er einmal in seiner "Volkscharaktertypologie" (1928) im 5. Band vom "Jahrbuch der Charakterologie", herausgeg. vom Juden Utitz (S.210): "Gänzlich abzulehnen ist aber jede Art begeistert dilettierender Rassen -

ideologie nach der Art Gobineaus und seiner unbegabteren Jünger. Ist man schon genötigt, die sogen. indogermanische, indoeuropäische, arische Rasse .... als Fiktion aufzugeben, so lässt sich auch mit der slawischen Rasse da nicht mehr arbeiten .....

Also : auf Literaturgeschichtlichem Gebiet (Bogolstudie s.o. S. 2) mit voller Begeln im Fahrwasser der Freud'schen Psychoanalyse, in der Volkstums- und Kulturgeschichtsforschung Arm in Arm mit dem Juden Utitz gegen den norrischen Rassegedanken! So steht Gesemann da.

Noch eine Eigenschaft seiner Arbeiten über Volkstum muss hier erwähnt werden, nämlich ihre Unselbständigkeit. Wie G. literaturgeschichtlich sehr stark abhängig ist von Murko und Škerlic, so ist er es auf seinem Darstellungsgebiet des Volkstums in sehr starkem Maße von Cvijić. Dieser war Geograph und Slawe. Ihn, den Slawen, interessierten die nordrassischen Einbrüche in das Südslawentum nicht. An dieser Stelle hätte die Arbeit des Deutschen Gesemann einsetzen müssen. Aber mit diesen nordrassischen Einbrüchen und ihren Folgen & für das Südslawentum gibt sich G. auch nicht andeutungsweise ab. Nicht einmal die Rassenkarte des Polen (!) Czekanowski, die Gesemann in Kindermanns Handbuch abdruckt (1936!) und die die Bedeutung dieses nordrassischen Einbruches deutlich zeigt, veranlasst ihn zu einer Erörterung. Hierfür sind nur zwei Erklärungen möglich : entweder kann Gesemann selbständige Forschung nicht treiben, oder aber er geht an diese für einen Deutschen wichtige Aufgabe wegen seiner ablehnenden Einstellung zur Rassenlehre nicht heran. Dass hier eine wichtige Aufgabe vorliegt, gesteht er selbst ein. Er stellt fest (Volkscharaktertypologie S.258), dass der pannonische Typus "dem serbokroatischen Volke das moralische und politische Rückgrat gab und gibt", dass von hier das "intellektuelle Rüstzeug" stammt, trotzdem muss er sagen : "ich bin nun aber in einer mißlichen Lage: Ich bin verpflichtet, den Leser darauf hinzuweisen, dass ich aus persönlicher Erfahrung nur den "serbisch" fühlenden Teil der Pannonier gut kenne ....". Wie schon erwähnt, hat Cvijić auf diesem Gebiet nicht gearbeitet. Die Abhängigkeit von dem räumlichen und sachlichen Arbeitsfelde Cvijić's zeigt

sich hier sehr eindrucksvoll : dort, wo Cvijić's Arbeitsertrag liegt, erscheint auch immer Gesemanns Darstellungsfeld, während er genau dort, wo Cv. nur wenige Seiten vorlegt, gestehen muss, dass er keine tieferen Aufschlüsse geben könne. In der letzten Zeit betont nun Gesemann wiederholt den deutschen Einfluß auf die Südslawen und tadelt sogar die Versäumnisse der Forschung ! Das ist sehr billig ! Inzwischen hat nämlich ein anderer deutscher Südslawist, der Grazer Matl, das Vers umte nachzuholen und die Lücke zu füllen begonnen.

Gegen den Vertreter einer solchen Wissenschaftlichkeit, die weltanschaulich die Annahme der Freud'schen Psychoanalyse und die Ablehnung des Rassengedankens zeigt, ergeben sich mir naturgemäß die schwersten Bedenken.

#### Pädagogisch.

Gesemann erweist sich in Einzelvorträgen und als ein ausgezeichnete Redner und glänzender Darsteller. Es liegt ihm, persönliche Reiseerlebnisse und Eindrücke aus Südslawien zu erzählen, die in der Regel sehr gut charakterisierende Streiflichter auf die zu behandelnden Fragen werfen. Diese geistreiche Darstellungsweise wirkt sehr interessant. Der Lehrbetrieb auf der Universität fordert aber mehr, und da versagt G. seine Vorlesungen und Übungen werden nicht als gut bezeichnet.

#### Organisatorisch.

Hier in Leipzig ist anfangs gesagt worden, man wolle in Gesemann einen "Organisator" gewinnen. Davon zu reden hat man aber bald aufgehört. G. hat in Prag sehr reichliche Geldmittel zur Verfügung gehabt. Er hat es aber nicht verstanden, die Deutsche Universität in Prag zum Zentrum der deutschen Slavistik zu machen, das sie hätte werden sollen.

#### Charakterlich.

Hier muss ich auf Dinge zu sprechen kommen, die ich sehr ungern berühre. Die Person Gesemanns hat in Prag den Mittelpunkt von Skandalgeschichten gebildet. In studentischen Kreisen wurde

erzählt, dass er zu den Studentinnen das Lehrer - Schüler - Verhältnis nicht gewahrt habe. Um diesen Verüchten die Spitze abzubrechen, hat G. folgenden Weg eingeschlagen : er suchte sich als Urheber und Verbreiter aller Skandalgeschichten, die man sich in studentischen Kreisen und darüber hinaus in Frag von ihm erzählte, den einzigen Menschen aus, den er unter Druck setzen konnte, nämlich seinen damaligen Assistenten, den jetzigen Professor an der Deutschen Universität Prag, Dr. Ferdinand Liewehr. Dann koppelte er seinen eigenen, durch die Geschichten besudelten Namen mit dem des - in seinem Privatleben völlig einwandfreien - Professor Spina, des anderen Direktors des Slawischen Seminars, und als nun Liewehr um die Verlängerung seiner Dienstzeit als Assistent einkommen musste, erklärte G., dass er seine Zustimmung zum Verbleiben Dr. Liewehrs in der Assistentenstellung von dessen Unterzeichnung der folgenden Erklärung abhängig mache :

" Der Unterzeichnete erklärt hiermit, dass er alle abfälligen sowie beleidigenden und verleumderischen Äusserungen, die er über die Personen seiner Seminardirektoren Prof. Spina und Gesemann getan hat und die ihm in einer Sitzung der Seminar- direktion am 24. I. 1933 vorgehalten wurden, mit dem Ausdrucke des tiefsten Bedauerns zurücknimmt als unstatthaft und unwahr. Er sieht ein, dass sein Verhalten gegenüber seinen Vorgesetzten sich nicht mit den Forderungen menschlichen Instandes und nicht mit seinen Pflichten als Assistent am Seminar verträgt".

24. I. 33.

Unterschrift : Ferdinand Liewehr.

Wie die Abschrift zeigt, hat Dr. Liewehr die Erklärung unterzeichnet. Diese Erklärung schickte G. selbst, als er erfuhr, dass die Skandalgeschichten auch hier in Leipzig bekannt seien, an ein Mitglied der Kommission für die Südosteuropa-Professur, von dem das Schriftstück dann sofort an den damaligen Dekan weitergeleitet wurde. Zu der Erklärung Liewehrs will nun gar nicht passen, dass derselbe Mann, der sich nach dem Wortlaut solche Verstöße hat zuschulden kommen lassen, zuerst den Titel eines ao. Professors erhalten und dann sogar zum planmässigen ao. Professor an seiner Universität vorgeschlagen wird. Ich erhielt über Prof. Schier die Darstellung des Vorganges durch Prof. Liewehr, die m.E. den Stempel der Wahrheit trägt. Die Angaben Liewehrs halte ich für richtig 1.) weil er trotz der Sache befördert worden ist und 2.) weil er eigentlich jedes persönliche



Interesse daran hätte, dass G. von Prag wegberufen würde, da er dann selbst - wie der Vorschlag Liewehrs zum beamteten ao. Professor dertut - Gesemann's Nachfolger werden würde.

G.'s Vorgehen in dieser Angelegenheit - und ich habe es nur mit seinem Verhalten zu tun - verurteile ich auf das entschiedenste. Wollte er die Unwahrheit der Geschichten nachweisen, so konnte er das durch ein Disziplinarverfahren tun, das er gegen sich selbst beantragte. Ob die Art, wie G. die Unterzeichnung der Erklärung durch Liewehr erreichte, juristisch als Unterschriftserpressung zu bezeichnen ist, weiß ich nicht, moralisch wird sie von mir - und wohl nicht von mir allein - als eine solche empfunden.

Von den Skandalgeschichten selbst, die in Prag in Umlauf waren und sind, erwähne ich keine. Ich behandle aber einen Fall, zu dem ich die notwendigen schriftlichen Unterlagen habe. Ende 1932 oder Anfang 1933 kam Frä. Maria Bilansky zu Professor Schier, der damals an der Deutschen Universität Prag wirkte, um sich mit ihm über ein germanistisches Thema für eine Dissertation zu besprechen. Auf Prof. Schier's Frage erklärte die Studentin, sie hätte eine Doktorarbeit auf dem Gebiete der Slawistik fertig, Gesemann habe auch erklärt, die Dissertation annehmen zu wollen, er habe aber eine unsittliche Zumutung an sie gestellt, auf die sie nie eingehen wolle. Es hätte eine scharfe Auseinandersetzung zwischen G. und ihr gegeben. Und von nun an wolle sie mit dem Manne nichts mehr zu tun haben. In einem Briefe vom 11. II. 1936, der in den Händen der Leipziger Dozentenführung ist, hielt die Studentin die Erklärung, dass Gesemann ihr einen ungehörigen Antrag gemacht habe, voll aufrecht. Es heisst in dem Briefe :  
"...denn nach wie vor halte ich diese Behauptung aufrecht und ich kann - wenn ich die Wahrheit sprechen lasse - nicht ein Jot davon widerrufen". Der weitere Inhalt dieses Briefes ergibt, dass G. die Briefschreiberin mit einem Gehege von "x - Ehrenwörtern" umgehen habe, "die mir strengstes Stillschweigen, gegen wen auch immer, geboten, vor allem aber gegen meine eigenen Eltern, gegen alle Behörden, vorgesetzten Stellen und übrigen Herren Hochschul-Professoren. Diesen letztgenannten feierlichen Akt liess er auch manchmal, d h. wenn er es für ungefährlicher und ratsamer hielt,

von einem seiner Günstlinge vornehmen. Die näheren Schilderungen dieser Ehrenorterplessungen sind schriftlich nicht wiedergebar und würden viel zu weit führen. Tatsache aber ist, daß man mir im jeweils erforderlichen Augenblick immer wieder mein Ehrenwort in Erinnerung brachte, "mit meiner Unständigkeit rechnete", "auf meine Charakterfestigkeit baute" etc. "

Gesemann hat, wie er sagt, davon erfahren - dann aber diesmal bestimmt nicht von Leipziger Seite - dass die Angelegenheit Bilansky in Deutschland bekannt sei. Er hat versucht, die Studentin ebenso wie seinerzeit Prof. Liewehr, unter Druck zu setzen. Die Studentin kam darauf Mitte April d. J., begleitet von einem Verwandten, nach Leipzig. Das Protokoll über die Besprechung mit der Studentin in Gegenwart von Zeugen, der dazugehörige Situationsbericht und die auszugsweise Abschrift eines Briefes der Studentin an Professor Schier (s. Anlagen) zeigen, dass Frä. Bilansky ihre Behauptung aufrecht erhält, obwohl G. mit allen möglichen Mitteln versucht, sie zu einem Widerruf zu bringen. Ich weise darauf hin, dass Professor Rippl, der im Auftrage G's mit der Dame stundenlang verhandelte, auch wieder von ihr die Abgabe der ehrenwörtlichen Erklärung forderte, von dem Gespräch und dessen Inhalt weder ihren Eltern noch irgendeiner anderen Person irgendwie Kenntnis zu geben und sie ferner ersuchte, sich in dieser Angelegenheit auch nicht an einen Rechtsanwalt zu wenden. Ich hebe nachdrücklichst hervor, dass die Studentin - ohne eine Ahnung von dem Vorgang Liewehr zu haben - nach dem Vorgefallenen fürchtet, einem so starken Druck ausgesetzt zu werden, dass sie mit Rücksicht auf ihr eigenes Fortkommen (Doktor- und Staats-examen) zu einem unwahren Widerruf ihrer bisherigen Erklärung, G. habe ihr Unsittliches zugemutet, getrieben werden könnte. Daher gab sie von sich aus hier in Leipzig die Versicherung ab, dass ihre bisherige Erklärung die lautere Wahrheit sei, selbst wenn sie später in Prag unter Zwang etwas anderes - sogar schriftlich - erklären sollte.

Dieser ganze Fall mit all' seinen Begleiterscheinungen wirft ein sehr schlechtes Licht auf G's Charakter. Die Studentin selbst machte auf uns bei der Besprechung den Eindruck eines ruhigen und

anständigen Menschen. Von irgendwelcher Dreistigkeit oder freiem Benehmen, die zu einem solchen Ansinnen, wie G. es an sie gestellt hat, herausfordern könnten, ist aber auch gar nichts zu merken. Wir haben übereinstimmend den Eindruck, dass sie sich schämte, überhaupt von den Dingen sprechen zu müssen. Sie wirkt durchaus normal gesund, sodass auch der Gedanke, ihre Behauptung sei der Ausfluss von Wunschvorstellungen, nicht aufkommen kann.

Politisch.

Das Urteil, das ich mir auf Grund der zahlreichen und manchmal sehr ausführlichen Auskünfte und nach genauer Abwägung der entscheidenden Momente über die politische Haltung Prof. Gesemanns gebildet habe, lautet dahin, dass Professor Gesemann politisch nicht zuverlässig ist. Denn immer wieder findet sich bei den Auskunftserteilern, die ihn genauer kennen, der Hinweis, er habe nicht die nationalsozialistische Einstellung zum Sowjet- und Judentum. Das Urteil über seine politische Haltung beruht auf folgenden Tatsachen :

1.) Im November 1932 hielt G. bei Gelegenheit der 15 Jahrfeyer der Sowjet- Republik - offenbar aus freiem Willen und ohne jede Verpflichtung dazu - eine Rede, in der er die "schöpferische Leistung" der Sowjet- Union pries. Als er das Wort ergriff, wurde er von der Versammlung "stürmisch begrüßt". Die Rede enthielt folgende Äusserung :

"Die Schicksalsverbundenheit der deutschen und der russischen Nation darf auch heute nicht vergessen werden. Wann immer die beiden Völker sich gegeneinander statt nebeneinander stellten, haben beide es zu büßen gehabt. Auch in der heutigen Lage gehören Deutschland und Russland zusammen trotz aller weltanschaulichen Verschiedenheiten. Im Zeichen der Lehren deutscher Gelehrter, Hegels und Marxens, vollzieht sich der russische Umschwung. Für die Slavisten wäre die Welt öde ohne das neue Russland, ohne die schöpferische Leistung der letzten 15 Jahre. Die Wissenschaft erhält die Beziehungen zur Sowjet-Union lebendig, auch wenn Politiker und Wirtschaftler noch nicht überall so weit sind".

Diese Darstellung des Vorgangs entnehme ich dem Bericht, den die weit verbreitete liberale deutsche Zeitung "Bohemia" vom 6. Nov. 1932 (105. Jg. Nr. 262) von der Feier gibt. Der Bericht der "Bohemia" ist von Prof. Gesemann nicht beanstandet worden.

Ich bemerke zu dieser Angelegenheit : Der vollständige Bericht der "Bohemia" zeigt eindeutig, dass die ganze Feier eine

einzigste Verherrlichung des russischen Bolschewismus gewesen ist. Prof. G. wusste also ganz genau, in welchem Rahmen er seine Rede hielt. Weiter gibt die Bemerkung des Berichtes zu denken, dass Prof. G. "stürmisch begrüßt" das Wort zu seiner Rede ergriff. Er muß somit in diesen kommunistischen Kreisen gut bekannt und sehr geschätzt gewesen sein.

Ferner weise ich darauf hin, dass Prof. Gesemann diese seine Hinneigung zu Sowjetrußland bis in die jüngste Zeit bekundet hat. Die "Slawische Rundschau", die Prof. Gesemann zusammen mit Franz Spina im Verlag der von Prof. Gesemann gegründeten und geleiteten "Deutschen Gesellschaft für slawistische Forschung in Prag" bis Ende 1936 herausgegeben hat, bringt in Heft 5 des Jahrganges VIII, erschienen im September 1936, von dem tschechischen Kommunisten Fr. Pišek, dem Sekretär des Verbandes der Freunde der Sowjetunion in Brünn, einen Aufsatz "Der Kampf gegen die Verflachung in der Sowjetschule", in dem unter Bezugnahme auf Verordnungen von Stalin, Kirov und Ždanov die Reformbestrebungen im sowjetrussischen Schulwesen gelobt werden. Auch in folgenden (6.) Heft, das kurz nach Mitte November 1936 erschienen ist, sind zwei Propaganda-Artikel für Sowjetrußland enthalten. A. J. Nekrasov schreibt dort einen Artikel: "Neues Bauen in Moskau", in dem die öffentlichen Bauten der Sowjets einer eingehenden Würdigung unterzogen und die neuerrichteten Arbeitersiedlungen Moskaus als vorbildliche Leistungen einer volksnahen Staatsführung hingestellt werden. In demselben Heft veröffentlicht H. Swoboda einen Aufsatz über das "Musikleben in der Sowjetunion", in dem er die großzügige Musikpflege der Sowjetregierung rühmt. Auf dem Titelblatt des Heftes 6 zeichnen Franz Spina und Gerhard Gesemann als verantwortliche Herausgeber. Solche Propagandaartikel für die Sowjets deckt Prof. Gesemann noch Mitte November 1936 mit seinem Namen, also nachdem der Führer auf dem Reichsparteitag 1936 an das deutsche Volk den <sup>stetsten</sup> ernstesten Appell gerichtet hat, gegen den Kommunismus jene Kampfstellung zu beziehen, die die Partei vor der Übernahme der Macht vierzehn Jahre eingenommen hat!

2.) Für das Sommerhalbjahr 1933 war Prof. G. zu Gastvorlesungen an die Universität Königsberg geladen. Gegen Ende April

jenes Jahres veranstalteten die Studenten der Slawistik, also seines Faches, in Prag einen Abschiedsabend für ihn. Bei dieser Gelegenheit hielt er eine Rede, in der er u. a. sagte, dass in Deutschland zur Zeit so traurige Verhältnisse herrschten, aber man hoffe ja, dass es einmal besser werde. An der Veranstaltung nahmen auch die Juden Rektor, Jacobsohn und Privatdozent Dr. Löwenstein - ein Berliner Emigrant - teil. Bei den angeführten Worten G's kam es von der Seite der Juden zu lebhaften Beifalls-äusserungen. Ich entnehme die Schilderung des Vorganges der mir schriftlich vorliegenden Äusserung eines einwandfreien Zeugen. - 2. hat mit seinen Worten sicherlich nicht die schwere wirtschaftliche Lage Deutschlands Ende April 1933 gemeint, eine Zeit, in der wir 6-7 Millionen Arbeitslose hatten. Wenn er die wirtschaftliche Lage Deutschlands im Sinne gehabt hatte, so hätte ihn der an dieser Stelle lebhafte Beifall der Juden stutzig gemacht, und er hätte ergänzend und den Eindruck berichtigend hinzugefügt, er habe nicht die politischen, sondern die wirtschaftlichen Verhältnisse gemeint. Er hat aber den Beifall der Juden, der den politischen Inhalt seiner Rede unterstrich, ruhig hingenommen und damit diese Auslegung seiner Worte als die richtige anerkannt.

3.) In Mai 1935 wurde Gesemann, während er selbst in Königsberg war, zum Rektor der Deutschen Universität Prag für das Jahr 1933/34 gewählt. Die Linksblätter in Prag hatten für den Rektorwechsel die Parole ausgegeben: "Wird die Prager Deutsche Universität gleichgeschaltet oder nicht?" Zwei Kandidaten für den Rektorposten waren da, nämlich Professor Gierach und Prof. Gesemann. Gierach war der Kandidat der nationalsozialistisch gesinnten Deutschen. Minister Prof. Spina, der nächste Fachkollege und gute Bekannte - wahrscheinlich sogar Freund - Gesemanns, arbeitete für die Wahl Gesemanns zum Rektor einerseits mit der Drohung, Gierachs Wahl würde von der tschechischen Regierung mit der Einsetzung eines Regierungskommissars an der Universität usw. beantwortet werden, und andererseits mit der Versicherung, Gesemann sei ein der tschechischen Regierung genehmer Kandidat. Gesemann wurde dann mit den Stimmen der Liberalen und Juden zum Rektor gewählt. -- Ich bemerke hierzu: Die Wahl

Gesemann zum Rektor im Mai 1933 fand unter der Devise statt : "Prof. Hierachs Wahl bedeutet "Gleichschaltung" der Deutschen Universität Prag. Prof. Gesemann ist der liberalistische Gegenkandidat, der der tschechischen Regierung genehm ist".

Gesemann, der damals in Königsberg Vorlesungen hielt, also in nationalsozialistischer Umgebung lebte, liess es sich gefallen, unter diesen Umständen in Prag von den liberalistischen und jüdischen Freisen zum Rektor gewählt zu werden !

4.) Gesemann hat sich nicht gescheut - wie es in einer Auskunft heisst : "als einziger Deutscher" - ordentliches Mitglied der "Slovansky ustav" (des "Slawischen Instituts") in Prag zu werden. Die Wissenschaftlichkeit dieser Vereinigung ist politisch und verfolgt panslawistische Tendenzen.

5.) Im Jahre 1926, in der sogen. "aktivistischen Zeit", d.h. nach dem Eintritt des Deutschen, Professor Dr. Spina, in die tschechische Regierung, gründete Gesemann die "Slawische Rundschau". Zur Mitarbeit an dieser Zeitschrift zog er auch Herrn Mägr heran, der Redaktionsmitglied der "Prager Presse", des deutsch geschriebenen Tschechenblattes (Lemesch-Blattes) ist. Die Hoffnung auf die deutsch-tschechische Versöhnung zerschlug sich und Mägr gab seine Stelle in der Schriftleitung der "Slawischen Rundschau" auf. Gesemann hat aber den Jaanen Mägr auf dem Titelblatt der Zeitschrift bis zum Jahre 1935 weiter geführt. -- Neben Mägr fungiert an dieser Zeitschrift als Redakteurin für Polen Iza Saunova. Von ihr sagt der eine Auskunftserteiler, sie würde zu Unrecht als Jüdin bezeichnet, Gewissheit über diesen Punkt habe er aber nicht erlangen können, ein anderer gibt an, sie sei dem Aussehen nach Jüdin, und ein dritter erklärt, sie sei eine an einen slawischen Tschechen verheiratete polnische Jüdin aus Lemberg (alle drei Äusserungen liegen mir schriftlich vor). Ausser dass diese Frau Mitarbeiterin an der Zeitschrift ist, hat sie durch Minister Spina und Prof. Gesemann noch die Stellung als Lektorin für Polnisch an der Deutschen Universität Prag erhalten. - Zu den Mitarbeitern an der "Slawischen Rundschau" gehört noch der Jude Roman Jakobsohn, der jetzt Honorarprofessor an der tschechischen Universität Brünn ist. Früher war Roman Jakobsohn Presseshef der Sowjet- Gesandtschaft. Er ist damals

aus dem russischen Staatsdienst ausgestoßen worden, weil er - wie es heißt - ein Gegner des Kommunismus sei. Gesemann behält, wie gesagt wird, den Juden als Mitarbeiter, weil dieser in der Tschechoslowakei der beste Kenner der russischen Verhältnisse und daher für die Zeitschrift wissenschaftlich unersetzlich sei. - Daß bei solchen Mitarbeitern die Zeitschrift keinen deutschen Geist zeigen kann, ist ohne weiteres klar (vgl. oben S. 11).

6.) In seinem Gutachten über Gesemann behandelt Professor H. C. Meyer unter Punkt 3 Gesemanns Verhalten bei der Berufung des Juden Utitz. Prof. H. C. Meyer sagt: "Der Vorwurf, daß Gesemann zur Berufung eines jüdischen Emigranten an die Deutsche Universität Prag die Hand geboten habe, hat sich mir als unberechtigt erwiesen. Es handelte sich um die Berufung des Philosophen und Ästhetikers Emil Utitz von der Universität Halle, eines deutsch-jüdisch-tschechischen Mischlings. Seine Berufung war unabwendbar, da Utitz geborener Böhme ist, Widerspruch der Fakultät daher zwecklos gewesen wäre. Auch die Deutsche Gesamtschaft in Prag hält Gesemanns Verhalten in dieser Frage für vorwurfsfrei". Ich muss mich gegen diese Darstellung wenden. Utitz ist Jude, in Prag geboren. Er bekennt sich als Deutscher, nicht als Tscheche. Nach der Revolution verlor er seine Stelle an der Universität Halle, wanderte nach Prag aus und spielte dort in dem Kreis der intellektuellen Emigranten, der ja wegen seiner Gehässigkeit gegen das nationalsozialistische Deutschland bekannt ist, sehr bald eine bedeutsame Rolle. Utitz entfaltete dort von der ersten Stunde an eine riesige Geschäftigkeit und benahm sich in allem als echter, linksgerichteter Prager Jude. Er wurde in manchem so etwas wie der Philosoph der Burg, während Kelsen als deren völkerrechtlicher Vertrauensmann angesprochen werden kann. Gesemann hatte mit ihm vom "Jahrbuch der Charakterologie" her, das Utitz herausgibt (s. oben S. 2) enge Beziehungen. Als Utitz nun nach Prag kam, betrieb sein Schwager, der jüdische Geschichtswissenschaftler Artur Stein, eifrigst seine Berufung an die Deutsche Universität Prag. Die Kommission schlug Utitz auch vor. Es kam nun auf die Abstimmung in der Fakultätssitzung an. Gesemann hatte sich schon vorher für die Berufung des Juden Utitz stark eingesetzt.

und stimmte nun in der Fakultätssitzung für den Vorschlag, Utitz zu berufen. Trotz des heftigsten Widerstandes des nationalen Flügels in der Fakultät wurde Utitz mit den Stimmen der Juden und Liberalen, zu denen also auch Gesemann hielt, gewählt. Gesemann war Rektor der Deutschen Universität Prag im Wintersemester 1933/34 und hat in dieser Stellung die rasche Ernennung von Utitz zum Professor erwirkt. Durch die Ernennung von Utitz gewann der jüdisch-liberalistische Teil der Fakultät in Prag die absolute Stimmmehrheit gegenüber der nationalen Gruppe. Kein Wunder, daß die Südetendeutschen über Gesemann wegen des Falles Utitz erbittert sind! Das ist das Verhalten Gesemanns im Falle Utitz.

Nun zu dem anderen Punkt in der Darstellung Prof. A.C. Meyers, nämlich, daß die Berufung von Utitz unabwendbar gewesen sei. Offenbar ist Prof. A.C. Meyer falsch unterrichtet worden. In der Tschechoslowakei ist durch das Hochschulgesetz von 1919 festgelegt, daß zur Berufung eines Gelehrten der Vorschlag durch die Fakultät notwendig ist. Die Fakultät legt dem Ministerium einen Dreiervorschlag vor und das Ministerium ist daran gebunden; es kann nicht aus eigenem Ermessen einen Professor an einer Hochschule ernennen, Masaryk hat selbst diese Verfügung getroffen, um die Ernennungen dem Parteinfluss im Ministerium zu entziehen. Es ist also grundfalsch, dass die Berufung des Utitz unabwendbar war. Hätte die Fakultät Utitz abgelehnt, so konnte er nach dem in der Tschechoslowakei gültigen Hochschulgesetz vom Jahre 1919 nicht zum Professor an der Deutschen Universität Prag ernannt werden. Gesemann hat aber eifrig dafür gearbeitet und ja auch in der Fakultätssitzung dafür gestimmt, daß Utitz die Professur bekam. Gesemann warb und arbeitete für Utitz, weil er schon lange eng mit ihm verbunden war und weil er sich die jüdischen Stimmen für seine Rektorwahl sichern wollte.

Und für diesen Juden und gehässigen Gegner des Nationalsozialismus hat sich Gesemann so stark eingesetzt nach der Revolution in Deutschland und nachdem Gesemann selbst während seines Gastsemesters in Königsberg im Sommer 1933 das nationalsozialistische Deutschland und die Begeisterung des Volkes für den Führer und die Partei kennen gelernt hatte. Man will, wie Prof. A.C. Meyer es tut, alle möglichen Bekundungen der Juden- und Sowjetfreundlichkeit aus den "Berufsgefahren", denen ein deutscher Slawist auf dem



Iragen Boden ausgesetzt ist, erklären. So weit wird man aber wohl doch nicht gehen wollen, daß man das nur auch im Falle Utitz tut. In der eifrigen Betreibung der Berufung des Emigranten Utitz an die Deutsche Universität Prag hat Jesemann eindeutig seine Judenfreundschaft bekundet und ebenso eindeutig gegen das national - sozialistische Deutschland gearbeitet.

Zusammenfassend muss ich über Jesemanns politische Einstellung sagen : Mag er sich, wenn er in Deutschland weilt, auch national oder sogar nationalsozialistisch gebärden, die Tatsachen, die ich in dieser politischen Begutachtung aufgezählt habe, ergeben mit aller Deutlichkeit, dass seine Haltung gegenüber dem russischen Kommunismus und dem Judentum nicht die nationalsozialistische ist. Darum bezeichne ich ihn als politisch nicht zuverlässig.

*Kellang*

2. 6. 1937.

Dozentschaftsleiter und  
Dozentenbundsführer.
